# Supplementary material for: Curcumin (CUMINUP60®) mitigates exercise fatigue through regulating PI3K/Akt/AMPK/mTOR pathway in mice
Source: publisher site journal article supplement (doi:10.18632/aging.204614), 2023-03-28
Supplement: Supplementary file [file aging-v15i6-204614-supplementary-material-SD1.pdf]

## SUPPLEMENTARY FIGURE

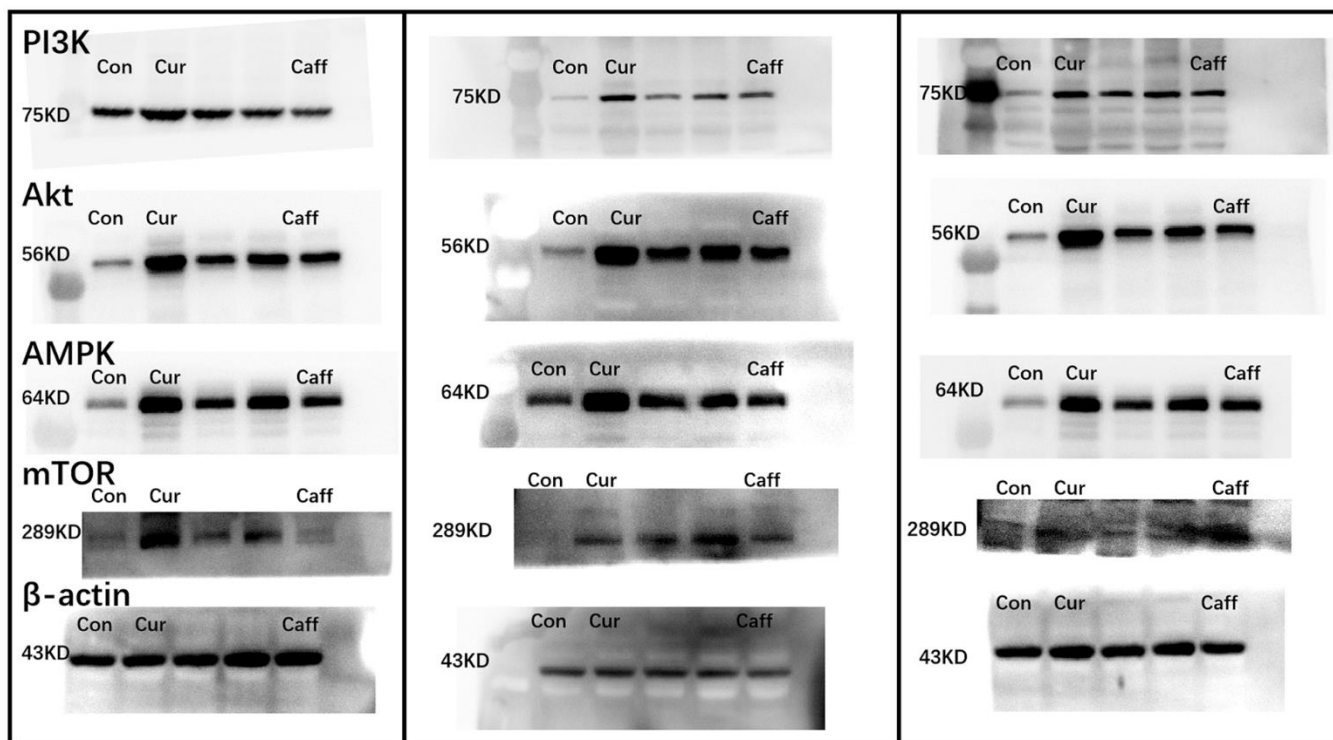

**Supplementary Figure 1.** The original images of the expression of the proteins in PI3K/Akt/AMPK/mTOR were detected via WB for three repeats. Columns 1, 2, and 5 are the control, curcumin, and caffeine groups, respectively. To present the results more visually, we have removed the two unrelated bands between the curcumin and caffeine groups in the paper.
